# Supplementary material for: Social-Environmental Injustice and Cancer Screening Prevalence
Source: PubMed Central journal article supplement (PMC11406390; doi:10.1001/jamanetworkopen.2024.33724), 2024-09-16
Supplement: jamanetwopen-e2433724-s001.pdf [file jamanetwopen-e2433724-s001.pdf]

## Supplemental Online Content

Ashad-Bishop KC, Wiese D, Baeker Bispo JA, Ogongo MK, Islami F, Bandi P. Social-environmental injustice and cancer screening prevalence. *JAMA Netw Open*. 2024;7(9):e2433724. doi:10.1001/jamanetworkopen.2024.33724

### **eMethods**

This supplemental material has been provided by the authors to give readers additional information about their work.

## eMethods

### Study Sample

Census-tract level data from the counties (Bronx, Kings, New York, Queens, and Richmond County, NY, Los Angeles County, CA, Cook County, IL, Harris County, TX, Maricopa County, AZ, and Philadelphia County, PA) containing the six most populous cities in the US (New York City, NY, Los Angeles, CA, Chicago, IL, Houston, TX, Phoenix, AZ, and Philadelphia, PA) were analyzed.

### Environmental Justice Index

Environmental injustice is the disproportionate exposure of communities of color and the poor to pollution, and its consequent effects on health and the environment, as well as unequal environmental protection and environmental quality provided through laws, regulations, governmental programs, enforcement, and policies. To quantify the exposures of social vulnerability, environmental burden, and social-environmental injustice at the neighborhood level, we utilized the 2022 release of the Environmental Justice Index (EJI) from the Centers for Disease Control and Prevention (CDC). The EJI is a place-based tool that ranks every census tract in the United States based on seventeen indicators of environmental burden and fourteen indicators of social factors that systematically render populations vulnerable to the health impacts of environmental injustice. There are also five indicators of health vulnerability in the Environmental Justice Index, but that module is recommended for exclusion when a health outcome is of interest. Due to a lack of scientific evidence supporting a specific weighting scheme, all modules are weighted equally in calculating the social vulnerability and environmental burden modules. For our analysis, we used the percentile ranked sum for social vulnerability and environmental burden to identify geographic hot spots of each in our six study areas, then computed social-environmental injustice as hotspots of both individual measures.

| Social Vulnerability and Environmental Burden Indicators of the Environmental Justice Index |                                        |
|---------------------------------------------------------------------------------------------|----------------------------------------|
| Domain                                                                                      | Indicator Name                         |
| Environmental Burden                                                                        | Ozone                                  |
|                                                                                             | PM2.5                                  |
|                                                                                             | Diesel Particulate Matter              |
|                                                                                             | Air Toxics Cancer Risk                 |
|                                                                                             | National Priority List Sites           |
|                                                                                             | Toxic Release Inventory Sites          |
|                                                                                             | Treatment, Storage, and Disposal Sites |
|                                                                                             | Risk Management Plan Sites             |
|                                                                                             | Coal Mines                             |
|                                                                                             | Lead Mines                             |
|                                                                                             | Lack of Recreational Park              |
|                                                                                             | Houses Built Pre-1980                  |
|                                                                                             | Lack of Walkability                    |
|                                                                                             | High-Volume Roads                      |
|                                                                                             | Railways                               |

|                      |                                          |
|----------------------|------------------------------------------|
|                      | Airports                                 |
|                      | Impaired Surface Water                   |
| Social Vulnerability | Minority Status                          |
|                      | Poverty                                  |
|                      | No High School Diploma                   |
|                      | Unemployment                             |
|                      | Housing Tenure                           |
|                      | Housing Burdened Lower-Income Households |
|                      | Lack of Health Insurance                 |
|                      | Broadband Access                         |
|                      | Age 65 and Older                         |
|                      | Age 17 and Younger                       |
|                      | Civilian with Disability                 |
|                      | Speaks English “Less than Well”          |
|                      | Mobile Homes                             |
|                      | Group Quarters                           |

**CDC PLACES**

The outcomes of this study were census tract-level prevalence of USPSTF guideline-concordant, up-to-date breast (mammography), cervical, and colorectal screenings from the CDC PLACES dataset. These are the only screen-detectable cancers included in the CDC PLACES dataset. PLACES provides small area estimations of 29 chronic disease health outcomes and health behaviors based on Behavioral Risk Factor Surveillance System (BRFSS) data and US Census data. We utilized the 2020 PLACES dataset, which corresponds to survey responses in the 2018 BRFSS.
