# Supplementary material for: Social-Environmental Injustice and Cancer Screening Prevalence
Source: PubMed Central journal article supplement (PMC11406390; doi:10.1001/jamanetworkopen.2024.33724), 2024-09-16
Supplement: jamanetwopen-e2433724-s002.pdf [file jamanetwopen-e2433724-s002.pdf]

## Data Sharing Statement

Ashad-Bishop. Social-Environmental Injustice and Cancer Screening Prevalence. *JAMA Netw Open*. Published September 16, 2024. doi:10.1001/jamanetworkopen.2024.33724

### Data

**Data available:** No

### Additional Information

**Explanation for why data not available:** All data is publicly available via the Centers for Disease Control and Prevention website.
